# Supplementary material
Source: ML conference proceedings conference paper supplement (https://proceedings.neurips.cc/paper_files/paper/2020/hash/f340f1b1f65b6df5b5e3f94d95b11daf-Abstract.html)
Supplement: Supplementary file [file f340f1b1f65b6df5b5e3f94d95b11daf-Supplemental.pdf]

## A Generalised Jensen's Inequality

In Section 4, we require a version of Jensen's inequality generalised to (possibly) infinite-dimensional vector spaces, because our random variable takes values in  $\mathcal{H}_X$ , and our convex function is  $\|\cdot\|_{\mathcal{H}_X}^2 : \mathcal{H}_X \rightarrow \mathbb{R}$ . Note that this square norm function is indeed convex, since, for any  $t \in [0, 1]$  and any pair  $f, g \in \mathcal{H}_X$ ,

$$\begin{aligned} \|tf + (1-t)g\|_{\mathcal{H}_X}^2 &\leq (t\|f\|_{\mathcal{H}_X} + (1-t)\|g\|_{\mathcal{H}_X})^2 && \text{by the triangle inequality} \\ &\leq t\|f\|_{\mathcal{H}_X}^2 + (1-t)\|g\|_{\mathcal{H}_X}^2, && \text{by the convexity of } x \mapsto x^2. \end{aligned}$$

The following theorem generalises Jensen's inequality to infinite-dimensional vector spaces.

**Theorem A.1** (Generalised Jensen's Inequality, [38], Theorem 3.10). *Suppose  $\mathcal{T}$  is a real Hausdorff locally convex (possibly infinite-dimensional) linear topological space, and let  $C$  be a closed convex subset of  $\mathcal{T}$ . Suppose  $(\Omega, \mathcal{F}, P)$  is a probability space, and  $V : \Omega \rightarrow \mathcal{T}$  a Pettis-integrable random variable such that  $V(\Omega) \subseteq C$ . Let  $f : C \rightarrow [-\infty, \infty)$  be a convex, lower semi-continuous extended-real-valued function such that  $\mathbb{E}_V[f(V)]$  exists. Then*

$$f(\mathbb{E}_V[V]) \leq \mathbb{E}_V[f(V)].$$

We will actually apply generalised Jensen's inequality with conditional expectations, so we need the following theorem.

**Theorem A.2** (Generalised Conditional Jensen's Inequality). *Suppose  $\mathcal{T}$  is a real Hausdorff locally convex (possibly infinite-dimensional) linear topological space, and let  $C$  be a closed convex subset of  $\mathcal{T}$ . Suppose  $(\Omega, \mathcal{F}, P)$  is a probability space, and  $V : \Omega \rightarrow \mathcal{T}$  a Pettis-integrable random variable such that  $V(\Omega) \subseteq C$ . Let  $f : C \rightarrow [-\infty, \infty)$  be a convex, lower semi-continuous extended-real-valued function such that  $\mathbb{E}_V[f(V)]$  exists. Suppose  $\mathcal{E}$  is a sub- $\sigma$ -algebra of  $\mathcal{F}$ . Then*

$$f(\mathbb{E}[V \mid \mathcal{E}]) \leq \mathbb{E}[f(V) \mid \mathcal{E}].$$

*Proof.* Let  $\mathcal{T}^*$  be the dual space of all real-valued continuous linear functionals on  $\mathcal{T}$ . The first part of the proof of [38, Theorem 3.6] tells us that, for all  $v \in \mathcal{T}$ , we can write

$$f(v) = \sup\{m(v) \mid m \text{ affine}, m \leq f \text{ on } C\},$$

where an *affine* function  $m$  on  $\mathcal{T}$  is of the form  $m(v) = v^*(v) + \alpha$  for some  $v^* \in \mathcal{T}^*$  and  $\alpha \in \mathbb{R}$ . If we define the subset  $Q$  of  $\mathcal{T}^* \times \mathbb{R}$  as

$$Q := \{(v^*, \alpha) : v^* \in \mathcal{T}^*, \alpha \in \mathbb{R}, v^*(v) + \alpha \leq f(v) \text{ for all } v \in \mathcal{T}\},$$

then we can rewrite  $f$  as

$$f(v) = \sup_{(v^*, \alpha) \in Q} \{v^*(v) + \alpha\}, \quad \text{for all } v \in \mathcal{T}. \quad (5)$$

See that, for any  $(v^*, \alpha) \in Q$ , we have

$$\begin{aligned} \mathbb{E}[f(V) \mid \mathcal{E}] &\geq \mathbb{E}[v^*(V) + \alpha \mid \mathcal{E}] && \text{almost surely, by assumption (*)} \\ &= \mathbb{E}[v^*(V) \mid \mathcal{E}] + \alpha && \text{almost surely, by linearity (**).} \end{aligned}$$

Here, (\*) and (\*\*) use the properties of conditional expectation of vector-valued random variables given in [12, pp.45-46, Properties 43 and 40 respectively].

We want to show that  $\mathbb{E}[v^*(V) \mid \mathcal{E}] = v^*(\mathbb{E}[V \mid \mathcal{E}])$  almost surely, and in order to so, we show that the right-hand side is a version of the left-hand side. The right-hand side is clearly  $\mathcal{E}$ -measurable, since we have a linear operator on an  $\mathcal{E}$ -measurable random variable. Moreover, for any  $A \in \mathcal{E}$ ,

$$\begin{aligned} \int_A v^*(\mathbb{E}[V \mid \mathcal{E}]) dP &= v^* \left( \int_A \mathbb{E}[V \mid \mathcal{E}] dP \right) && \text{by [10, p.403, Proposition E.11]} \\ &= v^* \left( \int_A V dP \right) && \text{by the definition of conditional expectation} \\ &= \int_A v^*(V) dP && \text{by [10, p.403, Proposition E.11]} \end{aligned}$$

(here, all the equalities are almost-sure equalities). Hence, by the definition of the conditional expectation, we have that  $\mathbb{E} [v^*(V) | \mathcal{E}] = v^* \left( \mathbb{E} [V | \mathcal{E}] \right)$  almost surely. Going back to our above work, this means that

$$\mathbb{E} [f(V) | \mathcal{E}] \geq v^* \left( \mathbb{E} [V | \mathcal{E}] \right) + \alpha.$$

Now take the supremum of the right-hand side over  $Q$ . Then (5) tells us that

$$\mathbb{E} [f(V) | \mathcal{E}] \geq f \left( \mathbb{E} [V | \mathcal{E}] \right),$$

as required.  $\square$

In the context of Section 4,  $\mathcal{H}_{\mathcal{X}}$  is real and Hausdorff, and locally convex (because it is a normed space). We take the closed convex subset to be the whole space  $\mathcal{H}_{\mathcal{X}}$  itself. The function  $\|\cdot\|_{\mathcal{H}_{\mathcal{X}}}^2 : \mathcal{H}_{\mathcal{X}} \rightarrow \mathbb{R}$  is convex (as shown above) and continuous, and finally, since Bochner-integrability implies Pettis integrability, all the conditions of Theorem A.2 are satisfied.

## B Generalisation Error Bounds

Caponnetto and De Vito [5] give an optimal rate of convergence of vector-valued RKHS regression estimators, and its results are quoted by Grünewälder et al. [22] as the state of the art convergence rates,  $O\left(\frac{\log n}{n}\right)$ . In particular, this implies that the learning algorithm is consistent. However, the lower rate uses an assumption that the output space is a finite-dimensional Hilbert space [5, Theorem 2]; and in our case, this will mean that  $\mathcal{H}_{\mathcal{X}}$  is finite-dimensional. This is not true if, for example, we take  $k_{\mathcal{X}}$  to be the Gaussian kernel; indeed, this is noted as a limitation by Grünewälder et al. [22], stating that “It is likely that this (finite-dimension) assumption can be weakened, but this requires a deeper analysis”. In this paper, we do not want to restrict our attention to finite-dimensional  $\mathcal{H}_{\mathcal{X}}$ . The upper bound would have been sufficient to guarantee consistency, but an assumption used in the upper bound requires the operator  $l_{XZ,z} : \mathcal{H}_{\mathcal{X}} \rightarrow \mathcal{G}_{\mathcal{XZ}}$  defined by

$$l_{XZ,z}(f)(z') = l_{XZ}(z, z')(f)$$

to be Hilbert-Schmidt for all  $z \in \mathcal{Z}$ . However, for each  $z \in \mathcal{Z}$ , taking any orthonormal basis  $\{\varphi_i\}_{i=1}^{\infty}$  of  $\mathcal{H}_{\mathcal{X}}$ , we see that

$$\begin{aligned} \sum_{i=1}^{\infty} \langle l_{XZ,z}(\varphi_i), l_{XZ,z}(\varphi_i) \rangle_{\mathcal{G}_{\mathcal{XZ}}} &= \sum_{i=1}^{\infty} \langle k_{\mathcal{Z}}(z, \cdot)\varphi_i, k_{\mathcal{Z}}(z, \cdot)\varphi_i \rangle_{\mathcal{G}_{\mathcal{XZ}}} \\ &= \sum_{i=1}^{\infty} \langle k_{\mathcal{Z}}(z, z)\varphi_i, \varphi_i \rangle_{\mathcal{H}_{\mathcal{X}}} \\ &= k_{\mathcal{Z}}(z, z) \sum_{i=1}^{\infty} 1 \\ &= \infty, \end{aligned}$$

meaning this assumption is not fulfilled with our choice of kernel either. Hence, results in [5], used by [22], are not applicable to guarantee consistency in our context.

Kadri et al. [26] address the problem of generalisability of function-valued learning algorithms, using the concept of uniform algorithmic stability [4]. Let us write

$$\mathcal{D} := \{(x_1, z_1), \dots, (x_n, z_n)\}$$

for our training set of size  $n$  drawn i.i.d. from the distribution  $P_{XZ}$ , and we denote by  $\mathcal{D}^i = \mathcal{D} \setminus (x_i, z_i)$  the set  $\mathcal{D}$  from which the data point  $(x_i, z_i)$  is removed. Further, we denote by  $\hat{F}_{P_{X|Z}, \mathcal{D}} = \hat{F}_{P_{X|Z}, n, \lambda}$  the estimate produced by our learning algorithm from the dataset  $\mathcal{D}$  by minimising the loss  $\hat{\mathcal{E}}_{X|Z, n, \lambda}(F) = \sum_{i=1}^n \|k_{\mathcal{X}}(x_i, \cdot) - F(z_i)\|_{\mathcal{H}_{\mathcal{X}}}^2 + \lambda \|F\|_{\mathcal{G}_{\mathcal{XZ}}}^2$

The assumptions used in this paper, with notations translated to our context, are

1. There exists  $\kappa_1 > 0$  such that for all  $z \in \mathcal{Z}$ ,

$$\|l_{\mathcal{X}\mathcal{Z}}(z, z)\|_{\text{op}} = \sup_{f \in \mathcal{H}_{\mathcal{X}}} \frac{\|l_{\mathcal{X}\mathcal{Z}}(z, z)(f)\|_{\mathcal{H}_{\mathcal{X}}}}{\|f\|_{\mathcal{H}_{\mathcal{X}}}} \leq \kappa_1^2.$$

2. The real function  $\mathcal{Z} \times \mathcal{Z} \rightarrow \mathbb{R}$  defined by

$$(z_1, z_2) \mapsto \langle l_{\mathcal{X}\mathcal{Z}}(z_1, z_2)f_1, f_2 \rangle_{\mathcal{H}_{\mathcal{X}}}$$

is measurable for all  $f_1, f_2 \in \mathcal{H}_{\mathcal{X}}$ .

3. The map  $(f, F, z) \mapsto \|f - F(z)\|_{\mathcal{H}_{\mathcal{X}}}^2$  is  $\tau$ -admissible, i.e. convex with respect to  $F$  and Lipschitz continuous with respect to  $F(z)$ , with  $\tau$  as its Lipschitz constant.

4. There exists  $\kappa_2 > 0$  such that for all  $(z, f) \in \mathcal{Z} \times \mathcal{H}_{\mathcal{X}}$  and any training set  $\mathcal{D}$ ,

$$\|f - \hat{F}_{P_{\mathcal{X}|Z}, \mathcal{D}}(z)\|_{\mathcal{H}_{\mathcal{X}}}^2 \leq \kappa_2.$$

The concept of *uniform stability*, with notations translated to our context, is defined as follows.

**Definition B.1** (Uniform algorithmic stability, [26, Definition 6]). For each  $F \in \mathcal{G}_{\mathcal{X}\mathcal{Z}}$ , define the function

$$\begin{aligned} \mathcal{R}(F) : \mathcal{Z} \times \mathcal{H}_{\mathcal{X}} &\rightarrow \mathbb{R} \\ (z, x) &\mapsto \|k_{\mathcal{X}}(x, \cdot) - F(z)\|_{\mathcal{H}_{\mathcal{X}}}^2. \end{aligned}$$

A learning algorithm that calculates the estimate  $\hat{F}_{P_{\mathcal{X}|Z}, \mathcal{D}}$  from a training set has uniform stability  $\beta$  with respect to the squared loss if the following holds: for all  $n \geq 1$ , all  $i \in \{1, \dots, n\}$  and any training set  $\mathcal{D}$  of size  $n$ ,

$$\|\mathcal{R}(\hat{F}_{P_{\mathcal{X}|Z}, \mathcal{D}}) - \mathcal{R}(\hat{F}_{P_{\mathcal{X}|Z}, \mathcal{D}^i})\|_{\infty} \leq \beta.$$

The next two theorems are quoted from [26].

**Theorem B.2** ([26, Theorem 7]). *Under assumptions 1, 2 and 3, a learning algorithm that maps a training set  $\mathcal{D}$  to the function  $\hat{F}_{P_{\mathcal{X}|Z}, \mathcal{D}} = \hat{F}_{P_{\mathcal{X}|Z}, n, \lambda}$  is  $\beta$ -stable with*

$$\beta = \frac{\tau^2 \kappa_1^2}{2\lambda n}.$$

**Theorem B.3** ([26, Theorem 8]). *Let  $\mathcal{D} \mapsto \hat{F}_{P_{\mathcal{X}|Z}, \mathcal{D}} = \hat{F}_{P_{\mathcal{X}|Z}, n, \lambda}$  be a learning algorithm with uniform stability  $\beta$ , and assume Assumption 4 is satisfied. Then, for all  $n \geq 1$  and any  $0 < \delta < 1$ , the following bound holds with probability at least  $1 - \delta$  over the random draw of training samples:*

$$\tilde{\mathcal{E}}_{\mathcal{X}|Z}(\hat{F}_{P_{\mathcal{X}|Z}, n, \lambda}) \leq \frac{1}{n} \hat{\mathcal{E}}_{\mathcal{X}|Z, n}(\hat{F}_{P_{\mathcal{X}|Z}, n, \lambda}) + 2\beta + (4n\beta + \kappa_2) \sqrt{\frac{\ln \frac{1}{\delta}}{2n}}.$$

Theorems B.2 and B.3 give us results about the generalisability of our learning algorithm. It remains to check whether the assumptions are satisfied.

Assumption 2 is satisfied thanks to our assumption that point embeddings are measurable functions, and Assumption 1 is satisfied if we assume that  $k_{\mathcal{Z}}$  is a bounded kernel (i.e. there exists  $B_{\mathcal{Z}} > 0$  such that  $k_{\mathcal{Z}}(z_1, z_2) \leq B_{\mathcal{Z}}$  for all  $z_1, z_2 \in \mathcal{Z}$ ), because

$$\|l_{\mathcal{X}\mathcal{Z}}(z, z)\|_{\text{op}} = \sup_{f \in \mathcal{H}_{\mathcal{X}}, \|f\|_{\mathcal{H}_{\mathcal{X}}}=1} \|k_{\mathcal{Z}}(z, z)(f)\|_{\mathcal{H}_{\mathcal{X}}} \leq B_{\mathcal{Z}}.$$

In [26], a general loss function is used rather than the squared loss, and it is noted that Assumption 3 is in general *not* satisfied with the squared loss, which is what we use in our context. However, this issue can be addressed if we restrict the output space to a bounded subset. In fact, the only elements in  $\mathcal{H}_{\mathcal{X}}$  that appear as the output samples in our case are  $k_{\mathcal{X}}(x, \cdot)$  for  $x \in \mathcal{X}$ , so if we place the assumption that  $k_{\mathcal{X}}$  is a bounded kernel (i.e. there exists  $B_{\mathcal{X}} > 0$  such that  $k_{\mathcal{X}}(x_1, x_2) \leq B_{\mathcal{X}}$  for all  $x_1, x_2 \in \mathcal{X}$ ), then by the reproducing property,

$$\|k_{\mathcal{X}}(x, \cdot)\|_{\mathcal{H}_{\mathcal{X}}} = \sqrt{k_{\mathcal{X}}(x, x)} \leq \sqrt{B_{\mathcal{X}}}.$$

So it is no problem, in our case, to place this boundedness assumption. [26, Appendix D] tells us that Assumption 1 with this boundedness assumption implies Assumption 4 with

$$\kappa_2 = B_{\mathcal{X}} \left( 1 + \frac{\kappa_1}{\sqrt{\lambda}} \right)^2,$$

while [26, Lemma 2] provides us with a condition which can replace Assumption 3 in Theorem B.2, giving us the uniform stability of our algorithm with

$$\beta = \frac{2\kappa_1^2 B_{\mathcal{X}} \left( 1 + \frac{\kappa_1}{\sqrt{\lambda}} \right)^2}{\lambda n}.$$

Then the result of Theorem B.3 holds with this new  $\beta$ .

## C Proofs

**Lemma 2.1.** For each  $f \in \mathcal{H}_{\mathcal{X}}$ ,  $\int_{\mathcal{X}} f(x) dP_{\mathcal{X}}(x) = \langle f, \mu_{P_{\mathcal{X}}} \rangle_{\mathcal{H}_{\mathcal{X}}}$ .

*Proof.* Let  $L_P$  be a functional on  $\mathcal{H}$  defined by  $L_P(f) := \int_{\mathcal{X}} f(x) dP(x)$ . Then  $L_P$  is clearly linear, and moreover,

$$\begin{aligned} |L_P(f)| &= \left| \int_{\mathcal{X}} f(x) dP(x) \right| \\ &= \left| \int_{\mathcal{X}} \langle f, k(x, \cdot) \rangle_{\mathcal{H}} dP(x) \right| && \text{by the reproducing property} \\ &\leq \int_{\mathcal{X}} |\langle f, k(x, \cdot) \rangle_{\mathcal{H}}| dP(x) && \text{by Jensen's inequality} \\ &\leq \|f\|_{\mathcal{H}} \int_{\mathcal{X}} \|k(x, \cdot)\|_{\mathcal{H}} dP(x) && \text{by Cauchy-Schwarz inequality.} \end{aligned}$$

Since the map  $x \mapsto k(x, \cdot)$  is Bochner  $P$ -integrable,  $L_P$  is bounded, i.e.  $L_P \in \mathcal{H}^*$ . So by the Riesz Representation Theorem, there exists a unique  $h \in \mathcal{H}$  such that  $L_P(f) = \langle f, h \rangle_{\mathcal{H}}$  for all  $f \in \mathcal{H}$ .

Choose  $f(\cdot) = k(x, \cdot)$  for some  $x \in \mathcal{X}$ . Then

$$\begin{aligned} h(x) &= \langle k(x, \cdot), h \rangle_{\mathcal{H}} \\ &= L_P(k(x, \cdot)) \\ &= \int_{\mathcal{X}} k(x', x) dP(x'), \end{aligned}$$

which means  $h(\cdot) = \int_{\mathcal{X}} k(x, \cdot) dP(x) = \mu_P(\cdot)$  (implicitly applying [12, Corollary 37]).  $\square$

**Lemma 2.3.** For  $f \in \mathcal{H}_{\mathcal{X}}$ ,  $g \in \mathcal{H}_{\mathcal{Y}}$ ,  $\langle f \otimes g, \mu_{P_{\mathcal{X} \otimes \mathcal{Y}}} \rangle_{\mathcal{H}_{\mathcal{X} \otimes \mathcal{Y}}} = \mathbb{E}_{XY}[f(X)g(Y)]$ .

*Proof.* For Bochner integrability, we see that

$$\begin{aligned} \mathbb{E}_{XY} \left[ \|k_{\mathcal{X}}(X, \cdot) \otimes k_{\mathcal{Y}}(Y, \cdot)\|_{\mathcal{H}_{\mathcal{X} \otimes \mathcal{Y}}} \right] &= \mathbb{E}_{XY} \left[ \sqrt{k_{\mathcal{X}}(X, X)} \sqrt{k_{\mathcal{Y}}(Y, Y)} \right] \\ &\leq \sqrt{\mathbb{E}_{\mathcal{X}} [k_{\mathcal{X}}(X, X)]} \sqrt{\mathbb{E}_{\mathcal{Y}} [k_{\mathcal{Y}}(Y, Y)]}, \end{aligned}$$

by Cauchy-Schwarz inequality. (2) now implies that  $k_{\mathcal{X}}(X, \cdot) \otimes k_{\mathcal{Y}}(Y, \cdot)$  is Bochner  $P_{\mathcal{X} \otimes \mathcal{Y}}$ -integrable.

Let  $L_{P_{\mathcal{X} \otimes \mathcal{Y}}}$  be a functional on  $\mathcal{H}_{\mathcal{X}} \otimes \mathcal{H}_{\mathcal{Y}}$  defined by  $L_{P_{\mathcal{X} \otimes \mathcal{Y}}}(\sum_i f_i \otimes g_i) := \mathbb{E}_{XY}[\sum_i f_i(X)g_i(Y)]$ . Then  $L_{P_{\mathcal{X} \otimes \mathcal{Y}}}$  is clearly linear, and moreover,

$$\begin{aligned} |L_{P_{\mathcal{X} \otimes \mathcal{Y}}}(\sum_i f_i \otimes g_i)| &= |\mathbb{E}_{XY}[\sum_i f_i(X)g_i(Y)]| \\ &\leq \mathbb{E}_{XY} \left[ \left| \sum_i f_i(X)g_i(Y) \right| \right] && \text{by Jensen's inequality} \end{aligned}$$

$$\begin{aligned}
&= \mathbb{E}_{XY} \left[ \left\| \left\langle \sum_i f_i \otimes g_i, k_{\mathcal{X}}(X, \cdot) \otimes k_{\mathcal{Y}}(Y, \cdot) \right\rangle_{\mathcal{H}_{\mathcal{X}} \otimes \mathcal{H}_{\mathcal{Y}}} \right\| \right] && \text{by the reproducing property} \\
&\leq \left\| \sum_i f_i \otimes g_i \right\|_{\mathcal{H}_{\mathcal{X}} \otimes \mathcal{H}_{\mathcal{Y}}} \mathbb{E}_{XY} \left[ \left\| k_{\mathcal{X}}(X, \cdot) \otimes k_{\mathcal{Y}}(Y, \cdot) \right\|_{\mathcal{H}_{\mathcal{X}} \otimes \mathcal{H}_{\mathcal{Y}}} \right] && \text{by Cauchy-Schwarz inequality.}
\end{aligned}$$

Hence, by Bochner integrability shown above,  $L_{P_{XY}} \in (\mathcal{H}_{\mathcal{X}} \otimes \mathcal{H}_{\mathcal{Y}})^*$ . So by the Riesz Representation Theorem, there exists  $h \in \mathcal{H}_{\mathcal{X}} \otimes \mathcal{H}_{\mathcal{Y}}$  such that  $L_{P_{XY}}(\sum_i f_i \otimes g_i) = \langle \sum_i f_i \otimes g_i, h \rangle_{\mathcal{H}_{\mathcal{X}} \otimes \mathcal{H}_{\mathcal{Y}}}$  for all  $\sum_i f_i \otimes g_i \in \mathcal{H}_{\mathcal{X}} \otimes \mathcal{H}_{\mathcal{Y}}$ .

Choose  $k_{\mathcal{X}}(x, \cdot) \otimes k_{\mathcal{Y}}(y, \cdot) \in \mathcal{H}_{\mathcal{X}} \otimes \mathcal{H}_{\mathcal{Y}}$  for some  $x \in \mathcal{X}$  and  $y \in \mathcal{Y}$ . Then

$$\begin{aligned}
h(x, y) &= \langle k_{\mathcal{X}}(x, \cdot) \otimes k_{\mathcal{Y}}(y, \cdot), h \rangle_{\mathcal{H}_{\mathcal{X}} \otimes \mathcal{H}_{\mathcal{Y}}} && \text{by the reproducing property} \\
&= L_{P_{XY}}(k_{\mathcal{X}}(x, \cdot) \otimes k_{\mathcal{Y}}(y, \cdot)) \\
&= \mathbb{E}_{XY} [k_{\mathcal{X}}(x, X) \otimes k_{\mathcal{Y}}(y, Y)] \\
&= \mu_{P_{XY}}(x, y),
\end{aligned}$$

as required.  $\square$

**Lemma C.1.** Let  $\{\varphi_i\}_{i=1}^{\infty}$  and  $\{\psi_j\}_{j=1}^{\infty}$  be orthonormal bases of  $\mathcal{H}_{\mathcal{X}}$  and  $\mathcal{H}_{\mathcal{Y}}$  respectively (note that they are countable, since the RKHSs are separable). Then the map

$$\begin{aligned}
\Phi : \mathcal{H}_{\mathcal{X}} \otimes \mathcal{H}_{\mathcal{Y}} &\rightarrow \text{HS}(\mathcal{H}_{\mathcal{X}}, \mathcal{H}_{\mathcal{Y}}) \\
\sum_{i=1, j=1}^{\infty} c_{i,j}(\varphi_i \otimes \psi_j) &\mapsto [h \mapsto \sum_{i=1, j=1}^{\infty} c_{i,j} \langle h, \varphi_i \rangle_{\mathcal{H}_{\mathcal{X}}} \psi_j]
\end{aligned}$$

is an isometric isomorphism.

*Proof.*  $\Phi$  is clearly linear. We first show isometry:

$$\begin{aligned}
\left\| \Phi \left( \sum_{i=1, j=1}^{\infty} c_{i,j}(\varphi_i \otimes \psi_j) \right) \right\|_{\text{HS}}^2 &= \left\| \sum_{i=1, j=1}^{\infty} c_{i,j} \langle \cdot, \varphi_i \rangle_{\mathcal{H}_{\mathcal{X}}} \psi_j \right\|_{\text{HS}}^2 \\
&= \sum_{k=1}^{\infty} \left\| \sum_{i=1, j=1}^{\infty} c_{i,j} \langle \varphi_k, \varphi_i \rangle_{\mathcal{H}_{\mathcal{X}}} \psi_j \right\|_{\mathcal{H}_{\mathcal{Y}}}^2 && \text{by definition} \\
&= \sum_{i=1, j=1}^{\infty} c_{i,j}^2 && \text{by orthonormality} \\
&= \left\| \sum_{i=1, j=1}^{\infty} c_{i,j}(\varphi_i \otimes \psi_j) \right\|_{\mathcal{H}_{\mathcal{X}} \otimes \mathcal{H}_{\mathcal{Y}}}^2 && \text{by orthonormality,}
\end{aligned}$$

as required. It remains to show surjectivity.

Take an element  $T \in \text{HS}(\mathcal{H}_{\mathcal{X}}, \mathcal{H}_{\mathcal{Y}})$ . Then  $T$  is completely determined by  $\{T\varphi_i\}_{i=1}^{\infty}$ . For each  $i$ , suppose  $T\varphi_i = \sum_{j=1}^{\infty} d_j^i \psi_j$ , with  $d_j^i \in \mathbb{R}$  for all  $i$  and  $j$ . Then

$$\begin{aligned}
\Phi \left( \sum_{i'=1, j=1}^{\infty} d_j^{i'}(\varphi_{i'} \otimes \psi_j) \right) &= \left[ \varphi_i \mapsto \sum_{i'=1, j=1}^{\infty} \langle d_j^{i'} \varphi_{i'}, \varphi_i \rangle_{\mathcal{H}_{\mathcal{X}}} \psi_j \right] \\
&= \left[ \varphi_i \mapsto \sum_{j=1}^{\infty} d_j^i \psi_j \right] && \text{by orthonormality} \\
&= T.
\end{aligned}$$

So  $\Phi$  is surjective, and hence an isometric isomorphism.  $\square$

Before we prove Theorem 2.9, we state the following definition and theorems related to measurable functions for Banach-space valued functions.

**Definition C.2** ([12, p.4, Definition 5]). A function  $H : \Omega \rightarrow \mathcal{H}$  is called an  $\mathcal{F}$ -simple function if it has the form  $H = \sum_{i=1}^n h_i \mathbf{1}_{B_i}$  for some  $h_i \in \mathcal{H}$  and  $B_i \in \mathcal{F}$ .

A function  $H : \Omega \rightarrow \mathcal{H}$  is said to be  $\mathcal{F}$ -measurable if there is a sequence  $(H_n)$  of  $\mathcal{H}$ -valued,  $\mathcal{F}$ -simple functions such that  $H_n \rightarrow H$  pointwise.

**Theorem C.3** ([12, p.4, Theorem 6]). *If  $H : \Omega \rightarrow \mathcal{H}$  is  $\mathcal{F}$ -measurable, then there is a sequence  $(H_n)$  of  $\mathcal{H}$ -valued,  $\mathcal{F}$ -simple functions such that  $H_n \rightarrow H$  pointwise and  $|H_n| \leq |H|$  for every  $n$ .*

**Theorem C.4** ([12, p.19, Theorem 48], Lebesgue Convergence Theorem). *Let  $(H_n)$  be a sequence in  $L^1_{\mathcal{H}}(P)$ ,  $H : \Omega \rightarrow \mathcal{H}$  a  $P$ -measurable function, and  $g \in L^1_+(P)$  such that  $H_n \rightarrow H$   $P$ -almost everywhere and  $|H_n| \leq g$ ,  $P$ -almost everywhere, for each  $n$ . Then  $H \in L^1_{\mathcal{H}}(P)$  and  $H_n \rightarrow H$  in  $L^1_{\mathcal{H}}(P)$ , i.e.  $\int_{\Omega} H_n dP \rightarrow \int_{\Omega} H dP$ .*

**Theorem 2.9.** Suppose that  $P(\cdot | \mathcal{E})$  admits a regular version  $Q$ . Then  $QH : \Omega \rightarrow \mathcal{H}$  with  $\omega \mapsto Q_{\omega}H = \int_{\Omega} H(\omega')Q_{\omega}(d\omega')$  is a version of  $\mathbb{E}[H | \mathcal{E}]$  for every Bochner  $P$ -integrable  $H$ .

*Proof.* Suppose  $H$  is Bochner  $P$ -integrable. Since  $Q$  is a regular version of  $P(\cdot | \mathcal{E})$ , it is a probability transition kernel from  $(\Omega, \mathcal{E})$  to  $(\Omega, \mathcal{F})$ .

We first show that  $QH$  is measurable with respect to  $\mathcal{E}$ . The map  $Q : \Omega \rightarrow \mathcal{H}$  is well-defined, since, for each  $\omega \in \Omega$ ,  $Q_{\omega}H$  is the Bochner-integral of  $H$  with respect to the measure  $B \rightarrow Q_{\omega}(B)$ . Since  $H$  is  $\mathcal{F}$ -measurable, by Theorem C.3, there is a sequence  $(H_n)$  of  $\mathcal{H}$ -valued,  $\mathcal{F}$ -simple functions such that  $H_n \rightarrow H$  pointwise. Then for each  $\omega \in \Omega$ ,  $Q_{\omega}H = \lim_{n \rightarrow \infty} Q_{\omega}H_n$  by Theorem C.4. But for each  $n$ , we can write  $H_n = \sum_{j=1}^m h_j \mathbf{1}_{B_j}$  for some  $h_j \in \mathcal{H}$  and  $B_j \in \mathcal{F}$ , and so  $Q_{\omega}H_n = \sum_{j=1}^m h_j Q_{\omega}(B_j)$ . For each  $B_j$  the map  $\omega \mapsto Q_{\omega}(B_j)$  is  $\mathcal{E}$ -measurable (by the definition of transition probability kernel, Definition 2.7), and so as a linear combination of  $\mathcal{E}$ -measurable functions,  $QH_n$  is  $\mathcal{E}$ -measurable. Hence, as a pointwise limit of  $\mathcal{E}$ -measurable functions,  $QH$  is also  $\mathcal{E}$ -measurable, by [12, p.6, Theorem 10].

Next, we show that, for all  $A \in \mathcal{E}$ ,  $\int_A H dP = \int_A QH dP$ . Fix  $A \in \mathcal{E}$ . By Theorem C.3, there is a sequence  $(H_n)$  of  $\mathcal{H}$ -valued,  $\mathcal{F}$ -simple functions such that  $H_n \rightarrow H$  pointwise. For each  $n$ , we can write  $H_n = \sum_{j=1}^m h_j \mathbf{1}_{B_j}$  for some  $h_j \in \mathcal{H}$  and  $B_j \in \mathcal{F}$ , and

$$\begin{aligned} \int_A QH_n dP &= \int_A \sum_{j=1}^m h_j Q(B_j) dP \\ &= \int_A \sum_{j=1}^m h_j P(B_j | \mathcal{E}) dP \quad \text{since } Q \text{ is a version of } P(\cdot | \mathcal{E}) \\ &= \sum_{j=1}^m h_j \int_A \mathbb{E}[\mathbf{1}_{B_j} | \mathcal{E}] dP \quad \text{by the definition of conditional probability measures} \\ &= \int_A \sum_{j=1}^m h_j \mathbf{1}_{B_j} dP \quad \text{by the definition of conditional expectations, since } A \in \mathcal{E} \\ &= \int_A H_n dP. \end{aligned}$$

We have  $H_n \rightarrow H$  pointwise by assertion, and as before,  $QH_n \rightarrow QH$  pointwise. Hence,

$$\begin{aligned} \int_A QH dP &= \lim_{n \rightarrow \infty} \int_A QH_n dP \quad \text{by Theorem C.4} \\ &= \lim_{n \rightarrow \infty} \int_A H_n dP \quad \text{by above} \\ &= \int_A H dP \quad \text{by Theorem C.4.} \end{aligned}$$

Hence, by the definition of the conditional expectation,  $QH$  is a version of  $\mathbb{E}[H | \mathcal{E}]$ .  $\square$

**Lemma 3.2.** For any  $f \in \mathcal{H}_X$ ,  $\mathbb{E}_{X|Z}[f(X) | Z] = \langle f, \mu_{P_{X|Z}} \rangle_{\mathcal{H}_X}$  almost surely.

*Proof.* The left-hand side is the conditional expectation of the real-valued random variable  $f(X)$  given  $Z$ . We need to check that the right-hand side is also that. Note that  $\langle f, \mu_{P_{X|Z}} \rangle_{\mathcal{H}_X}$  is clearly  $Z$ -measurable, and  $P$ -integrable (by the Cauchy-Schwarz inequality and the integrability condition (1)). Take any  $A \in \sigma(Z)$ . Then

$$\begin{aligned}
\int_A \langle f, \mu_{P_{X|Z}} \rangle_{\mathcal{H}_X} dP &= \int_A \left\langle f, \mathbb{E}_{X|Z}[k_X(\cdot, X) | Z] \right\rangle_{\mathcal{H}_X} dP && \text{by definition} \\
&= \left\langle f, \int_A \mathbb{E}_{X|Z}[k_X(\cdot, X) | Z] dP \right\rangle_{\mathcal{H}_X} && (+) \\
&= \left\langle f, \int_A k_X(\cdot, X) dP \right\rangle_{\mathcal{H}_X} && \text{see Definition 2.5} \\
&= \int_A \langle f, k_X(\cdot, X) \rangle_{\mathcal{H}_X} dP && (+) \\
&= \int_A f(X) dP && \text{by the reproducing property.}
\end{aligned}$$

Here, in (+), we used the fact that the order of a continuous linear operator and Bochner integration can be interchanged [12, p.30, Theorem 36]. Hence  $\langle f, \mu_{P_{X|Z}} \rangle_{\mathcal{H}_X}$  is a version of the conditional expectation  $\mathbb{E}_{X|Z}[f(X) | Z]$ .  $\square$

**Lemma 3.3.** For any pair  $f \in \mathcal{H}_X$  and  $g \in \mathcal{H}_Y$ ,  $\mathbb{E}_{XY|Z}[f(X)g(Y) | Z] = \langle f \otimes g, \mu_{P_{XY|Z}} \rangle_{\mathcal{H}_X \otimes \mathcal{H}_Y}$  almost surely.

*Proof.* The left-hand side is the conditional expectation of the real-valued random variable  $f(X)g(Y)$  given  $Z$ . We need to check that the right-hand side is also that. Note that  $\langle f \otimes g, \mu_{P_{XY|Z}} \rangle_{\mathcal{H}_X \otimes \mathcal{H}_Y}$  is clearly  $Z$ -measurable, and  $P$ -integrable (by the Cauchy-Schwarz inequality and the integrability condition (2)). Take any  $A \in \sigma(Z)$ . Then

$$\begin{aligned}
\int_A \langle f \otimes g, \mu_{P_{XY|Z}} \rangle_{\mathcal{H}_X \otimes \mathcal{H}_Y} dP &= \int_A \left\langle f \otimes g, \mathbb{E}_{XY|Z}[k_X(\cdot, X) \otimes k_Y(\cdot, Y) | Z] \right\rangle_{\mathcal{H}_X \otimes \mathcal{H}_Y} dP \\
&= \left\langle f \otimes g, \int_A \mathbb{E}_{XY|Z}[k_X(\cdot, X) \otimes k_Y(\cdot, Y) | Z] dP \right\rangle_{\mathcal{H}_X \otimes \mathcal{H}_Y} \\
&= \left\langle f \otimes g, \int_A k_X(\cdot, X) \otimes k_Y(\cdot, Y) dP \right\rangle_{\mathcal{H}_X \otimes \mathcal{H}_Y} \\
&= \int_A \langle f \otimes g, k_X(\cdot, X) \otimes k_Y(\cdot, Y) \rangle_{\mathcal{H}_X \otimes \mathcal{H}_Y} dP \\
&= \int_A f(X)g(Y) dP.
\end{aligned}$$

So  $\langle f \otimes g, \mu_{P_{XY|Z}} \rangle_{\mathcal{H}_X \otimes \mathcal{H}_Y}$  is a version of the conditional expectation  $\mathbb{E}_{XY|Z}[f(X)g(Y) | Z]$ .  $\square$

**Theorem 4.1.** Assume that  $\mathcal{H}_X$  is separable, and denote its Borel  $\sigma$ -algebra by  $\mathcal{B}(\mathcal{H}_X)$ . Then we can write

$$\mu_{P_{X|Z}} = F_{P_{X|Z}} \circ Z,$$

where  $F_{P_{X|Z}} : \mathcal{Z} \rightarrow \mathcal{H}_X$  is some deterministic function, measurable with respect to  $\mathfrak{Z}$  and  $\mathcal{B}(\mathcal{H}_X)$ .

*Proof.* Let  $\text{Im}(Z) \subseteq \mathcal{Z}$  be the image of  $Z : \Omega \rightarrow \mathcal{Z}$ , and let  $\tilde{\mathfrak{Z}}$  denote the  $\sigma$ -algebra on  $\text{Im}(Z)$  defined by  $\tilde{\mathfrak{Z}} = \{A \cap \text{Im}(Z) : A \in \mathfrak{Z}\}$  (see [9, page 5, 1.15]). We will first construct a function  $\tilde{F} : \text{Im}(Z) \rightarrow \mathcal{H}_X$ , measurable with respect to  $\tilde{\mathfrak{Z}}$  and  $\mathcal{B}(\mathcal{H}_X)$ , such that  $\mu_{P_{X|Z}} = \tilde{F} \circ Z$ .

For a given  $z \in \text{Im}(Z) \subseteq \mathcal{Z}$ , we have  $Z^{-1}(z) \subseteq \Omega$ . Suppose for contradiction that there are two distinct elements  $\omega_1, \omega_2 \in Z^{-1}(z)$  such that  $\mu_{P_{X|Z}}(\omega_1) \neq \mu_{P_{X|Z}}(\omega_2)$ . Since  $\mathcal{H}_X$  is Hausdorff,

there are disjoint open neighbourhoods  $N_1$  and  $N_2$  of  $\mu_{P_{X|Z}}(\omega_1)$  and  $\mu_{P_{X|Z}}(\omega_2)$  respectively. By definition of a Borel  $\sigma$ -algebra, we have  $N_1, N_2 \in \mathcal{B}(\mathcal{H}_X)$ , and since  $\mu_{P_{X|Z}}$  is  $\sigma(Z)$ -measurable,

$$\mu_{P_{X|Z}}^{-1}(N_1), \mu_{P_{X|Z}}^{-1}(N_2) \in \sigma(Z). \quad (6)$$

Furthermore,  $\mu_{P_{X|Z}}^{-1}(N_1)$  and  $\mu_{P_{X|Z}}^{-1}(N_2)$  are neighbourhoods of  $\omega_1$  and  $\omega_2$  respectively, and are disjoint.

- (i) For any  $B \in \tilde{\mathfrak{J}}$  with  $z \in B$ , since  $Z(\omega_1) = z = Z(\omega_2)$ , we have  $\omega_1, \omega_2 \in Z^{-1}(B)$ . So  $Z^{-1}(B) \neq \mu_{P_{X|Z}}^{-1}(N_1)$  and  $Z^{-1}(B) \neq \mu_{P_{X|Z}}^{-1}(N_2)$ , as  $\omega_2 \notin \mu_{P_{X|Z}}^{-1}(N_1)$  and  $\omega_1 \notin \mu_{P_{X|Z}}^{-1}(N_2)$ .
- (ii) For any  $B \in \tilde{\mathfrak{J}}$  with  $z \notin B$ , we have  $\omega_1 \notin Z^{-1}(B)$  and  $\omega_2 \notin Z^{-1}(B)$ . So  $Z^{-1}(B) \neq \mu_{P_{X|Z}}^{-1}(N_1)$  and  $Z^{-1}(B) \neq \mu_{P_{X|Z}}^{-1}(N_2)$ .

Since  $\sigma(Z) = \{Z^{-1}(B) \mid B \in \tilde{\mathfrak{J}}\}$  (see [9], page 11, Exercise 2.20), we can't have  $\mu_{P_{X|Z}}^{-1}(N_1) \in \sigma(Z)$  nor  $\mu_{P_{X|Z}}^{-1}(N_2) \in \sigma(Z)$ . This is a contradiction to (6). We therefore conclude that, for any  $z \in \mathcal{Z}$ , if  $Z(\omega_1) = z = Z(\omega_2)$  for distinct  $\omega_1, \omega_2 \in \Omega$ , then  $\mu_{P_{X|Z}}(\omega_1) = \mu_{P_{X|Z}}(\omega_2)$ .

We define  $\tilde{F}(z)$  to be the unique value of  $\mu_{P_{X|Z}}(\omega)$  for all  $\omega \in Z^{-1}(z)$ . Then for any  $\omega \in \Omega$ ,  $\mu_{P_{X|Z}}(\omega) = \tilde{F}(Z(\omega))$  by construction. It remains to check that  $\tilde{F}$  is measurable with respect to  $\tilde{\mathfrak{J}}$  and  $\mathcal{B}(\mathcal{H}_X)$ .

Take any  $N \in \mathcal{B}(\mathcal{H}_X)$ . Since  $\mu_{P_{X|Z}}$  is  $\sigma(Z)$ -measurable,  $\mu_{P_{X|Z}}^{-1}(N) = Z^{-1}(\tilde{F}^{-1}(N)) \in \sigma(Z)$ . Since  $\sigma(Z) = \{Z^{-1}(B) \mid B \in \tilde{\mathfrak{J}}\}$ , we have  $Z^{-1}(\tilde{F}^{-1}(N)) = Z^{-1}(C)$  for some  $C \in \tilde{\mathfrak{J}}$ . Since the mapping  $Z : \Omega \rightarrow \text{Im}(Z)$  is surjective,  $\tilde{F}^{-1}(N) = C$ . Hence  $\tilde{F}^{-1}(N) \in \tilde{\mathfrak{J}}$ , and so  $\tilde{F}$  is measurable with respect to  $\tilde{\mathfrak{J}}$  and  $\mathcal{B}(\mathcal{H}_X)$ .

Finally, we can extend  $\tilde{F} : \text{Im}(Z) \rightarrow \mathcal{H}_X$  to  $F : \mathcal{Z} \rightarrow \mathcal{H}_X$  by [13, page 128, Corollary 4.2.7] (note that  $\mathcal{H}_X$  is a complete metric space, and assumed to be separable in this theorem).  $\square$

**Theorem 4.2.**  $F_{P_{X|Z}} \in L^2(\mathcal{Z}, P_Z; \mathcal{H}_X)$  minimises both  $\tilde{\mathcal{E}}_{X|Z}$  and  $\mathcal{E}_{X|Z}$ , i.e.

$$F_{P_{X|Z}} = \arg \min_{F \in L^2(\mathcal{Z}, P_Z; \mathcal{H}_X)} \mathcal{E}_{X|Z}(F) = \arg \min_{F \in L^2(\mathcal{Z}, P_Z; \mathcal{H}_X)} \tilde{\mathcal{E}}_{X|Z}(F).$$

Moreover, it is almost surely unique, i.e. it is almost surely equal to any other minimiser of the objective functionals.

*Proof.* Recall that we have

$$\mathcal{E}_{X|Z}(F) := \mathbb{E}_Z \left[ \|F_{P_{X|Z}}(Z) - F(Z)\|_{\mathcal{H}_X}^2 \right].$$

So clearly,  $\mathcal{E}_{X|Z}(F_{P_{X|Z}}) = 0$ , meaning  $F_{P_{X|Z}}$  minimises  $\mathcal{E}_{X|Z}$  in  $L^2(\mathcal{Z}, P_Z; \mathcal{H}_X)$ . So it only remains to show that  $\tilde{\mathcal{E}}_{X|Z}$  is minimised in  $L^2(\mathcal{Z}, P_Z; \mathcal{H}_X)$  by  $F_{P_{X|Z}}$ .

Let  $F$  be any element in  $L^2(\mathcal{Z}, P_Z; \mathcal{H}_X)$ . Then we have

$$\begin{aligned} \tilde{\mathcal{E}}_{X|Z}(F) - \tilde{\mathcal{E}}_{X|Z}(F_{P_{X|Z}}) &= \mathbb{E}_{X,Z} [\|k_{\mathcal{X}}(X, \cdot) - F(Z)\|_{\mathcal{H}_X}^2] - \mathbb{E}_{X,Z} [\|k_{\mathcal{X}}(X, \cdot) - F_{P_{X|Z}}(Z)\|_{\mathcal{H}_X}^2] \\ &= \mathbb{E}_Z [\|F(Z)\|_{\mathcal{H}_X}^2] - 2\mathbb{E}_{X,Z} [\langle k_{\mathcal{X}}(X, \cdot), F(Z) \rangle_{\mathcal{H}_X}] \\ &\quad + 2\mathbb{E}_{X,Z} [\langle k_{\mathcal{X}}(X, \cdot), F_{P_{X|Z}}(Z) \rangle_{\mathcal{H}_X}] - \mathbb{E}_Z [\|F_{P_{X|Z}}(Z)\|_{\mathcal{H}_X}^2]. \end{aligned} \quad (7)$$

Here,

$$\mathbb{E}_{X,Z} [\langle k_{\mathcal{X}}(X, \cdot), F(Z) \rangle_{\mathcal{H}_X}] = \mathbb{E}_Z \left[ \mathbb{E}_{X|Z} [F(Z)(X) \mid Z] \right] \quad \text{by the reproducing property}$$



$$\begin{aligned}
&= \mathbb{E}_Z \left[ \langle F(Z), \mu_{P_{X|Z}} \rangle_{\mathcal{H}_X} \right] && \text{by Lemma 3.2} \\
&= \mathbb{E}_Z \left[ \langle F(Z), F_{P_{X|Z}}(Z) \rangle_{\mathcal{H}_X} \right] && \text{since } \mu_{P_{X|Z}} = F_{P_{X|Z}} \circ Z
\end{aligned}$$

and similarly,

$$\begin{aligned}
\mathbb{E}_{X,Z}[\langle k_{\mathcal{X}}(X, \cdot), F_{P_{X|Z}}(Z) \rangle_{\mathcal{H}_X}] &= \mathbb{E}_Z[\mathbb{E}_{X|Z}[F_{P_{X|Z}}(Z)(X) \mid Z]] && \text{by the reproducing property} \\
&= \mathbb{E}_Z \left[ \langle F_{P_{X|Z}}(Z), F_{P_{X|Z}}(Z) \rangle_{\mathcal{H}_X} \right] && \text{by Lemma 3.2} \\
&= \mathbb{E}_Z \left[ \|F_{P_{X|Z}}(Z)\|_{\mathcal{H}_X}^2 \right].
\end{aligned}$$

Substituting these expressions back into (7), we have

$$\begin{aligned}
&\tilde{\mathcal{E}}_{X|Z}(F) - \tilde{\mathcal{E}}_{X|Z}(F_{P_{X|Z}}) \\
&= \mathbb{E}_Z[\|F(Z)\|_{\mathcal{H}_X}^2] - 2\mathbb{E}_Z[\langle F(Z), F_{P_{X|Z}}(Z) \rangle_{\mathcal{H}_X}] + \mathbb{E}_Z[\|F_{P_{X|Z}}(Z)\|_{\mathcal{H}_X}^2] \\
&= \mathbb{E}_Z[\|F(Z) - F_{P_{X|Z}}(Z)\|_{\mathcal{H}_X}^2] \\
&\geq 0.
\end{aligned}$$

Hence,  $F_{P_{X|Z}}$  minimises  $\tilde{\mathcal{E}}_{X|Z}$  in  $L^2(\mathcal{Z}, P_Z; \mathcal{H}_X)$ . The minimiser is further more  $P_Z$ -almost surely unique; indeed, if  $F' \in L^2(\mathcal{Z}, P_Z; \mathcal{H}_X)$  is another minimiser of  $\tilde{\mathcal{E}}_{X|Z}$ , then the calculation in (7) shows that

$$\mathbb{E}_Z \left[ \|F_{P_{X|Z}}(Z) - F'(Z)\|_{\mathcal{H}_X}^2 \right] = 0,$$

which immediately implies that  $\|F_{P_{X|Z}}(Z) - F'(Z)\|_{\mathcal{H}_X} = 0$   $P_Z$ -almost surely, which in turn implies that  $F_{P_{X|Z}} = F'$   $P_Z$ -almost surely.  $\square$

**Theorem 4.4.** Suppose that  $k_{\mathcal{X}}$  and  $k_{\mathcal{Z}}$  are bounded kernels, i.e. there exist  $B_{\mathcal{Z}}, B_{\mathcal{X}} > 0$  such that  $\sup_{z \in \mathcal{Z}} k_{\mathcal{Z}}(z, z) \leq B_{\mathcal{Z}}$  and  $\sup_{x \in \mathcal{X}} k_{\mathcal{X}}(x, x) \leq B_{\mathcal{X}}$ , and that the operator-valued kernel  $l_{\mathcal{X}\mathcal{Z}}$  is  $\mathcal{C}_0$ -universal. Let the regularisation parameter  $\lambda_n$  decay to 0 at a slower rate than  $\mathcal{O}(n^{-1/2})$ . Then our learning algorithm that produces  $\hat{F}_{P_{X|Z}, n, \lambda_n}$  is universally consistent (in the surrogate loss  $\tilde{\mathcal{E}}_{X|Z}$ ), i.e. for any joint distribution  $P_{XZ}$  and constants  $\epsilon > 0$  and  $\delta > 0$ ,

$$P_{XZ}(\tilde{\mathcal{E}}_{X|Z}(\hat{F}_{P_{X|Z}, n, \lambda_n}) - \tilde{\mathcal{E}}_{X|Z}(F_{P_{X|Z}}) > \epsilon) < \delta$$

for large enough  $n$ .

*Proof.* Follows immediately from [37, Theorem 2.3].  $\square$

**Theorem 4.5.** In addition to the setting in Theorem 4.4, assume that  $F_{P_{X|Z}} \in \mathcal{G}_{\mathcal{X}\mathcal{Z}}$ . Let the regularisation parameter  $\lambda_n$  decay to 0 with rate  $\mathcal{O}(n^{-1/4})$ . Then  $\tilde{\mathcal{E}}_{X|Z}(\hat{F}_{P_{X|Z}, n, \lambda_n}) - \tilde{\mathcal{E}}_{X|Z}(F_{P_{X|Z}}) = \mathcal{O}_P(n^{-1/4})$ .

*Proof.* Follows immediately from [37, Theorem 2.4].  $\square$

**Theorem 5.2.** Suppose that  $k_{\mathcal{X}}$  is a characteristic kernel, that  $P_Z$  and  $P_{Z'}$  are absolutely continuous with respect to each other, and that  $P(\cdot \mid Z)$  and  $P(\cdot \mid Z')$  admit regular versions. Then  $\text{MCMD}_{P_{X|Z}, P_{X'|Z'}} = 0$   $P_Z$ - (or  $P_{Z'}$ -)almost everywhere if and only if, for  $P_Z$ - (or  $P_{Z'}$ -)almost all  $z \in \mathcal{Z}$ ,  $P_{X|Z=z}(B) = P_{X'|Z'=z}(B)$  for all  $B \in \mathfrak{X}$ .

*Proof.* Write  $Q$  and  $Q'$  for some regular versions of  $P(\cdot \mid Z)$  and  $P(\cdot \mid Z')$  respectively, and assume without loss of generality that the conditional distributions  $P_{X|Z}$  and  $P_{X'|Z'}$  are given by  $P_{X|Z}(\omega)(B) = Q_{\omega}(X \in B)$  and  $P_{X'|Z'}(\omega)(B) = Q'_{\omega}(X' \in B)$  for  $B \in \mathfrak{X}$ . By the definition of regular versions, for each  $B \in \mathfrak{X}$ , the real-valued random variables  $\omega \mapsto P_{X|Z}(\omega)(B)$  and  $\omega \mapsto P_{X'|Z'}(\omega)(B)$  are measurable with respect to  $Z$  and  $Z'$  respectively, and so there are functions  $R_B : \mathcal{Z} \rightarrow \mathbb{R}$  and  $R'_B : \mathcal{Z} \rightarrow \mathbb{R}$  such that  $P_{X|Z}(\omega)(B) = R_B(Z(\omega))$  and  $P_{X'|Z'}(\omega)(B) =$

$R'_B(Z'(\omega))$ . Moreover, for each fixed  $z \in \mathcal{Z}$ , the mappings  $B \mapsto P_{X|Z}(Z^{-1}(z))(B) = R_B(z)$  and  $B \mapsto P_{X'|Z'}(Z'^{-1}(z))(B) = R'_B(z)$  are measures. We write  $R_B(z) = P_{X|Z=z}(B)$  and  $R'_B(z) = P_{X'|Z'=z}(B)$ .

By Theorem 2.9, there exists an event  $A_1 \in \mathcal{F}$  with  $P(A_1) = 1$  such that for all  $\omega \in A_1$ ,

$$\mu_{P_{X|Z}}(\omega) := \mathbb{E}_{X|Z}[k_{\mathcal{X}}(X, \cdot) | Z](\omega) = \int_{\Omega} k_{\mathcal{X}}(X(\omega'), \cdot) Q_{\omega}(d\omega') = \int_{\mathcal{X}} k_{\mathcal{X}}(x, \cdot) P_{X|Z}(\omega)(dx),$$

and an event  $A_2 \in \mathcal{F}$  with  $P(A_2) = 1$  such that for all  $\omega \in A_2$ ,

$$\begin{aligned} \mu_{P_{X'|Z'}}(\omega) &:= \mathbb{E}_{X'|Z'}[k_{\mathcal{X}}(X', \cdot) | Z'](\omega) = \int_{\Omega} k_{\mathcal{X}}(X'(\omega'), \cdot) Q_{\omega}(d\omega') \\ &= \int_{\mathcal{X}} k_{\mathcal{X}}(x', \cdot) P_{X'|Z'}(\omega)(dx'). \end{aligned}$$

Suppose for contradiction that there exists some  $D \in \mathfrak{Z}$  with  $P_Z(D) > 0$  such that for all  $z \in D$ ,  $F_{P_{X|Z}}(z) \neq \int_{\mathcal{X}} k_{\mathcal{X}}(x, \cdot) R_{dx}(z)$ . Then  $P(Z^{-1}(D)) = P_Z(D) > 0$ , and hence  $P(Z^{-1}(D) \cap A_1) > 0$ . For all  $\omega \in Z^{-1}(D) \cap A_1$ , we have  $Z(\omega) \in D$ , and hence

$$\mu_{P_{X|Z}}(\omega) = F_{P_{X|Z}}(Z(\omega)) \neq \int_{\mathcal{X}} k_{\mathcal{X}}(x, \cdot) R_{dx}(Z(\omega)) = \int_{\mathcal{X}} k_{\mathcal{X}}(x, \cdot) P_{X|Z}(\omega)(dx).$$

This contradicts our assertion that  $\mu_{P_{X|Z}}(\omega) = \int_{\mathcal{X}} k_{\mathcal{X}}(x, \cdot) P_{X|Z}(\omega)(dx)$  for all  $\omega \in A_1$ , hence there does not exist  $D \in \mathfrak{Z}$  with  $P_Z(D) > 0$  such that for all  $z \in D$ ,  $F_{P_{X|Z}}(z) \neq \int_{\mathcal{X}} k_{\mathcal{X}}(x, \cdot) R_{dx}(z)$ . Therefore, there must exist some  $C_1 \in \mathfrak{Z}$  with  $P_Z(C_1) = 1$  such that for all  $z \in C_1$ ,  $F_{P_{X|Z}}(z) = \int_{\mathcal{X}} k_{\mathcal{X}}(x, \cdot) R_{dx}(z)$ . Similarly, there must exist some  $C_2 \in \mathfrak{Z}$  with  $P_{Z'}(C_2) = 1$  such that for all  $z \in C_2$ ,  $F_{P_{X'|Z'}}(z) = \int_{\mathcal{X}} k_{\mathcal{X}}(x, \cdot) R'_{dx}(z)$ . Since  $P_Z$  and  $P_{Z'}$  are absolutely continuous with respect to each other, we also have  $P_Z(C_2) = 1 = P_{Z'}(C_1)$ .

( $\implies$ ) Suppose first that  $\text{MCMD}_{P_{X|Z}, P_{X'|Z'}} = \|F_{P_{X|Z}} - F_{P_{X'|Z'}}\|_{\mathcal{H}_{\mathcal{X}}} = 0$   $P_Z$ -almost everywhere, i.e. there exists  $C \in \mathfrak{Z}$  with  $P_Z(C) = 1$  such that for all  $z \in C$ ,  $\|F_{P_{X|Z}}(z) - F_{P_{X'|Z'}}(z)\|_{\mathcal{H}_{\mathcal{X}}} = 0$ . Then for each  $z \in C \cap C_1 \cap C_2$ ,

$$\begin{aligned} \int_{\mathcal{X}} k_{\mathcal{X}}(x, \cdot) R_{dx}(z) &= F_{P_{X|Z}}(z) && \text{since } z \in C_1 \\ &= F_{P_{X'|Z'}}(z) && \text{since } z \in C \\ &= \int_{\mathcal{X}} k_{\mathcal{X}}(x, \cdot) R'_{dx}(z) && \text{since } z \in C_2. \end{aligned}$$

Since the kernel  $k_{\mathcal{X}}$  is characteristic, this means that  $B \mapsto R_B(z)$  and  $B \mapsto R'_B(z)$  are the same probability measure on  $(\mathcal{X}, \mathfrak{X})$ . By countable intersection, we have  $P_Z(C \cap C_1 \cap C_2) = 1$ , so  $P_Z$ -almost everywhere,

$$P_{X|Z=z}(B) = P_{X'|Z'=z}(B)$$

for all  $B \in \mathfrak{X}$ .

( $\impliedby$ ) Now assume there exists  $C \in \mathfrak{Z}$  with  $P_Z(C) = 1$  such that for each  $z \in C$ ,  $R_B(z) = R'_B(z)$  for all  $B \in \mathfrak{X}$ . Then for all  $z \in C \cap C_1 \cap C_2$ ,

$$\begin{aligned} &\|F_{P_{X|Z}}(z) - F_{P_{X'|Z'}}(z)\|_{\mathcal{H}_{\mathcal{X}}} \\ &= \left\| \int_{\mathcal{X}} k_{\mathcal{X}}(x, \cdot) R_{dx}(z) - \int_{\mathcal{X}} k_{\mathcal{X}}(x, \cdot) R'_{dx}(z) \right\|_{\mathcal{H}_{\mathcal{X}}} && \text{since } z \in C_1 \cap C_2 \\ &= \left\| \int_{\mathcal{X}} k_{\mathcal{X}}(x, \cdot) R_{dx}(z) - \int_{\mathcal{X}} k_{\mathcal{X}}(x, \cdot) R_{dx}(z) \right\|_{\mathcal{H}_{\mathcal{X}}} && \text{since } z \in C \\ &= 0, \end{aligned}$$

and since  $P_Z(C \cap C_1 \cap C_2) = 1$ ,  $\|F_{P_{X|Z}} - F_{P_{X'|Z'}}\|_{\mathcal{H}_{\mathcal{X}}} = 0$   $P_Z$ -almost everywhere.

□

**Theorem 5.4.** Suppose  $k_{\mathcal{X}} \otimes k_{\mathcal{Y}}$  is a characteristic kernel on  $\mathcal{X} \times \mathcal{Y}$ , and that  $P(\cdot | Z)$  admits a regular version. Then  $\text{HSCIC}(X, Y | Z) = 0$  almost surely if and only if  $X \perp\!\!\!\perp Y | Z$ .

*Proof.* Write  $Q$  for a regular version of  $P(\cdot | Z)$ , and assume without loss of generality that the conditional distributions  $P_{X|Z}$ ,  $P_{Y|Z}$  and  $P_{XY|Z}$  are given by  $P_{X|Z}(\omega)(B) = Q_{\omega}(X \in B)$  for  $B \in \mathcal{X}$ ,  $P_{Y|Z}(\omega)(C) = Q_{\omega}(Y \in C)$  for  $C \in \mathcal{Y}$  and  $P_{XY|Z}(\omega)(D) = Q_{\omega}((X, Y) \in D)$  for  $D \in \mathcal{X} \times \mathcal{Y}$ . By Theorem 2.9, there exists an event  $A_1 \in \mathcal{F}$  with  $P(A_1) = 1$  such that for all  $\omega \in A_1$ ,

$$\mu_{P_{X|Z}}(\omega) := \mathbb{E}_{X|Z}[k_{\mathcal{X}}(X, \cdot) | Z](\omega) = \int_{\Omega} k_{\mathcal{X}}(X(\omega'), \cdot) Q_{\omega}(d\omega') = \int_{\mathcal{X}} k_{\mathcal{X}}(x, \cdot) P_{X|Z}(\omega)(dx),$$

an event  $A_2 \in \mathcal{F}$  with  $P(A_2) = 1$  such that for all  $\omega \in A_2$ ,

$$\mu_{P_{Y|Z}}(\omega) := \mathbb{E}_{Y|Z}[k_{\mathcal{Y}}(Y, \cdot) | Z](\omega) = \int_{\Omega} k_{\mathcal{Y}}(Y(\omega'), \cdot) Q_{\omega}(d\omega') = \int_{\mathcal{Y}} k_{\mathcal{Y}}(y, \cdot) P_{Y|Z}(\omega)(dy),$$

and an event  $A_3 \in \mathcal{F}$  with  $P(A_3) = 1$  such that for all  $\omega \in A_3$ ,

$$\mu_{P_{XY|Z}}(\omega) = \int_{\mathcal{X} \times \mathcal{Y}} k_{\mathcal{X}}(x, \cdot) \otimes k_{\mathcal{Y}}(y, \cdot) P_{XY|Z}(\omega)(d(x, y)).$$

This means that, for each  $\omega \in A_1$ ,  $\mu_{P_{X|Z}}(\omega)$  is the mean embedding of  $P_{X|Z}(\omega)$ , and for each  $\omega \in A_2$ ,  $\mu_{P_{Y|Z}}(\omega)$  is the mean embedding of  $P_{Y|Z}(\omega)$ .

( $\implies$ ) Suppose first that  $\text{HSCIC}(X, Y | Z) = \|\mu_{P_{XY|Z}} - \mu_{P_{X|Z}} \otimes \mu_{P_{Y|Z}}\|_{\mathcal{H}_{\mathcal{X}} \otimes \mathcal{H}_{\mathcal{Y}}} = 0$  almost surely, i.e. there exists  $A \in \mathcal{F}$  with  $P(A) = 1$  such that for all  $\omega \in A$ ,  $\|\mu_{P_{XY|Z}}(\omega) - \mu_{P_{X|Z}}(\omega) \otimes \mu_{P_{Y|Z}}(\omega)\|_{\mathcal{H}_{\mathcal{X}} \otimes \mathcal{H}_{\mathcal{Y}}} = 0$ . Then for each  $\omega \in A \cap A_1 \cap A_2 \cap A_3$ ,

$$\begin{aligned} \int_{\mathcal{X} \times \mathcal{Y}} k_{\mathcal{X}}(x, \cdot) \otimes k_{\mathcal{Y}}(y, \cdot) P_{XY|Z}(\omega)(d(x, y)) &= \mu_{P_{XY|Z}}(\omega) && \text{since } \omega \in A_3 \\ &= \mu_{P_{X|Z}}(\omega) \otimes \mu_{P_{Y|Z}}(\omega) && \text{since } \omega \in A \\ &= \int_{\mathcal{X}} k_{\mathcal{X}}(x, \cdot) P_{X|Z}(\omega)(dx) \otimes \int_{\mathcal{Y}} k_{\mathcal{Y}}(y, \cdot) P_{Y|Z}(\omega)(dy) && \text{since } \omega \in A_1 \cap A_2 \\ &= \int_{\mathcal{X} \times \mathcal{Y}} k_{\mathcal{X}}(x, \cdot) \otimes k_{\mathcal{Y}}(y, \cdot) P_{X|Z}(\omega) P_{Y|Z}(\omega)(d(x, y)) && \text{by Fubini.} \end{aligned}$$

Since the kernel  $k_{\mathcal{X}} \otimes k_{\mathcal{Y}}$  is characteristic, the distributions  $P_{XY|Z}(\omega)$  and  $P_{X|Z}(\omega) P_{Y|Z}(\omega)$  on  $\mathcal{X} \times \mathcal{Y}$  are the same. By countable intersection, we have  $P(A \cap A_1 \cap A_2 \cap A_3) = 1$ , so  $P_{XY|Z}$  and  $P_{X|Z} P_{Y|Z}$  are the same almost surely, and we have  $X \perp\!\!\!\perp Y | Z$ .

( $\impliedby$ ) Now assume  $X \perp\!\!\!\perp Y | Z$ , i.e. there exists  $A \in \mathcal{F}$  with  $P(A) = 1$  such that for each  $\omega \in A$ , the distributions  $P_{XY|Z}(\omega)$  and  $P_{X|Z}(\omega) P_{Y|Z}(\omega)$  are the same. Then for all  $\omega \in A \cap A_1 \cap A_2 \cap A_3$ ,

$$\begin{aligned} \mu_{P_{XY|Z}}(\omega) &= \int_{\mathcal{X} \times \mathcal{Y}} k_{\mathcal{X}}(x, \cdot) \otimes k_{\mathcal{Y}}(y, \cdot) P_{XY|Z}(\omega)(d(x, y)) && \text{since } \omega \in A_3 \\ &= \int_{\mathcal{X} \times \mathcal{Y}} k_{\mathcal{X}}(x, \cdot) \otimes k_{\mathcal{Y}}(y, \cdot) P_{X|Z}(\omega)(dx) P_{Y|Z}(\omega)(dy) && \text{since } \omega \in A \\ &= \int_{\mathcal{X}} k_{\mathcal{X}}(x, \cdot) P_{X|Z}(\omega)(dx) \otimes \int_{\mathcal{Y}} k_{\mathcal{Y}}(y, \cdot) P_{Y|Z}(\omega)(dy) && \text{by Fubini} \\ &= \mu_{P_{X|Z}}(\omega) \otimes \mu_{P_{Y|Z}}(\omega) && \text{since } \omega \in A_1 \cap A_2. \end{aligned}$$

and since  $P(A \cap A_1 \cap A_2 \cap A_3) = 1$ ,  $\text{HSCIC}(X, Y | Z) = 0$  almost surely.

□
